# Supplementary material for: Molecular Modeling of the M3 Acetylcholine Muscarinic Receptor and Its Binding Site
Source: Hindawi journal article supplement (doi:10.1155/2012/789741), 2012-01-01

Figure 1S

F222A

5' for CCGGGAGAGTGCGCTATTCAGTTCCTC

5' rev GAGGAACTGAATAGCGCACTCTCCCGG

T235A

5' for TTACTTTTGGCGCAGCCATCGCTGC

5' rev GCAGCGATGGCTGCGCCAAAAGTAA

Figure 2S

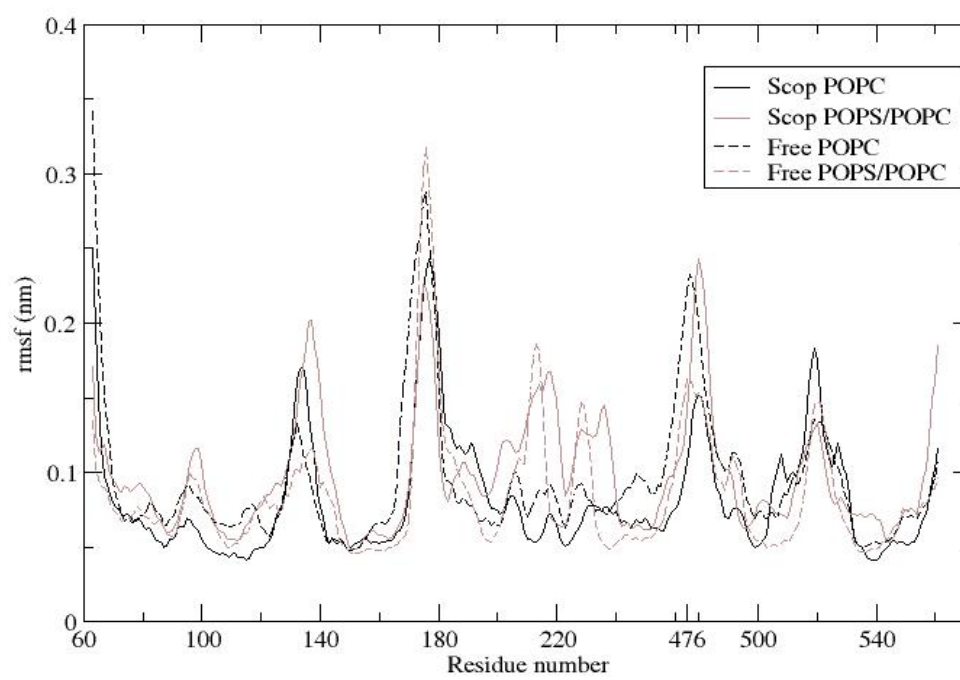

Figure 3S

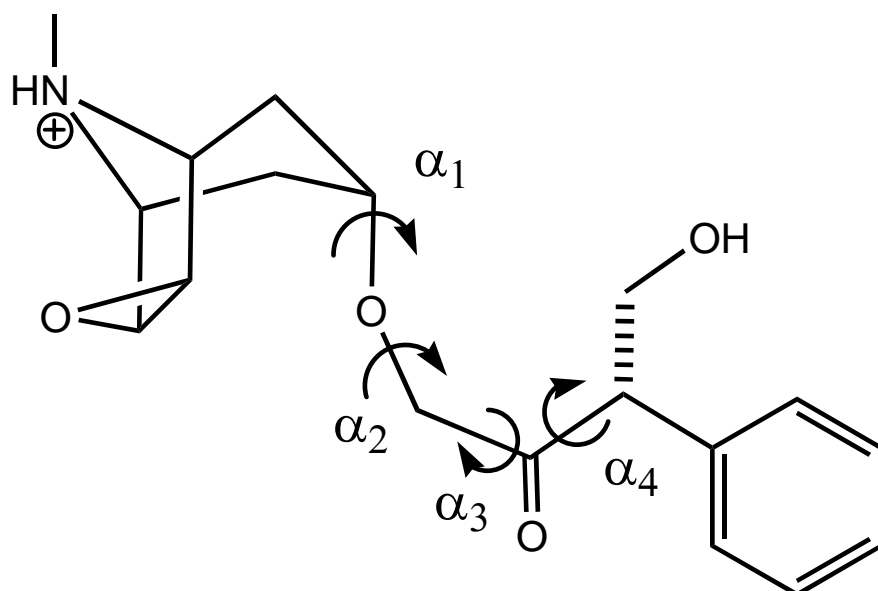

Figure 4S

(a)

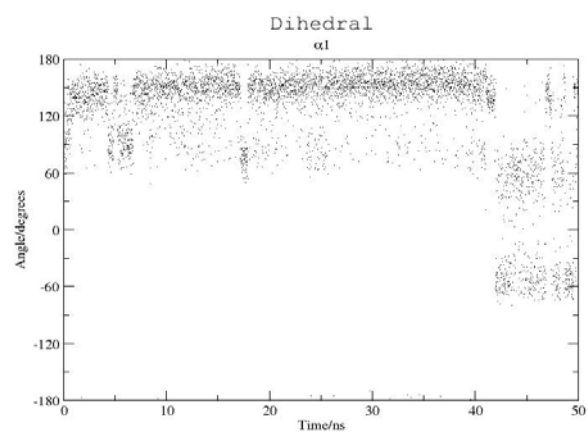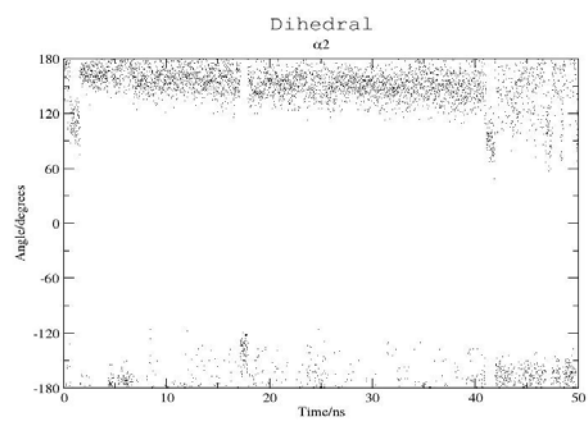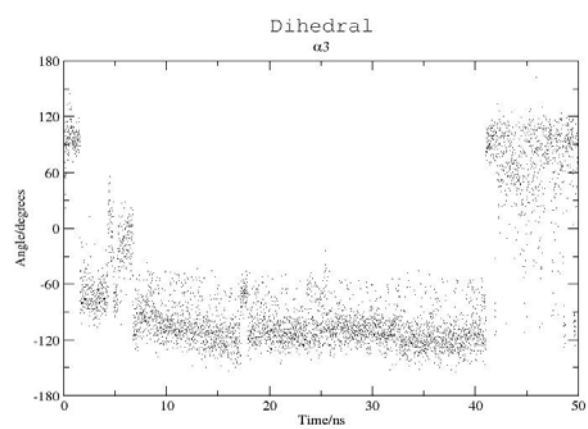

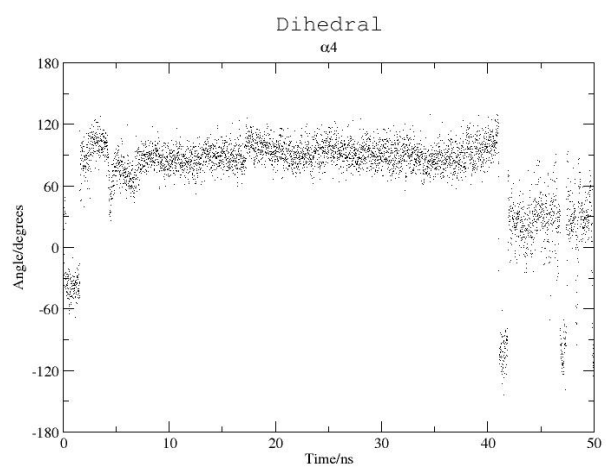

b)

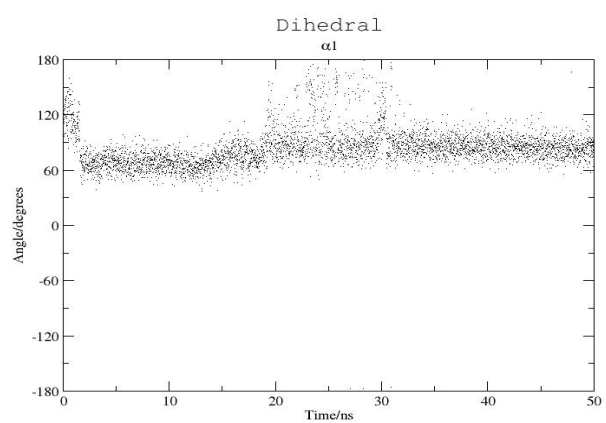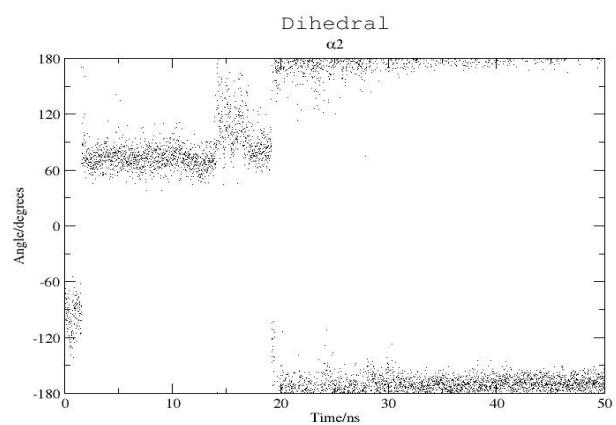

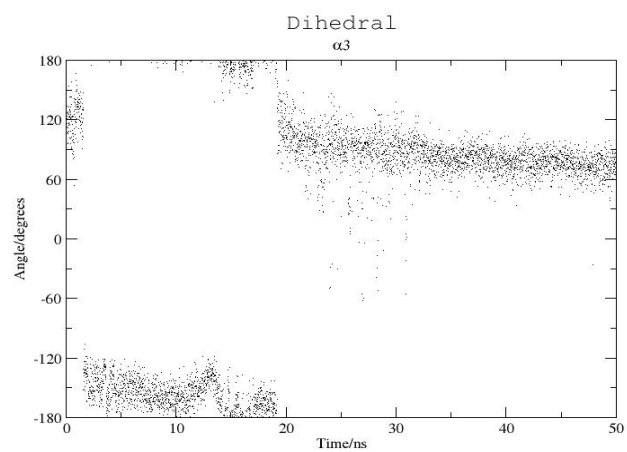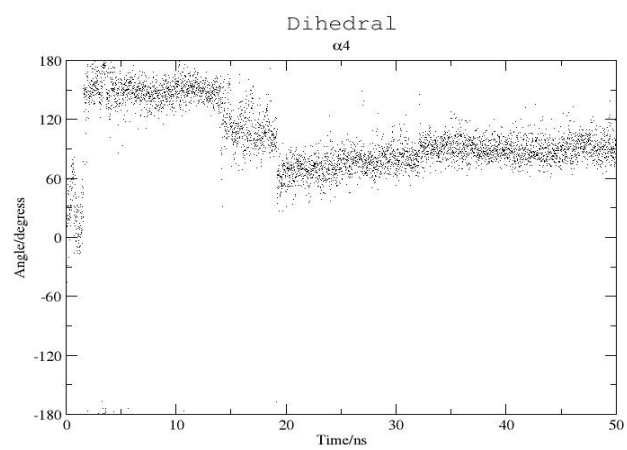

Figure 5S

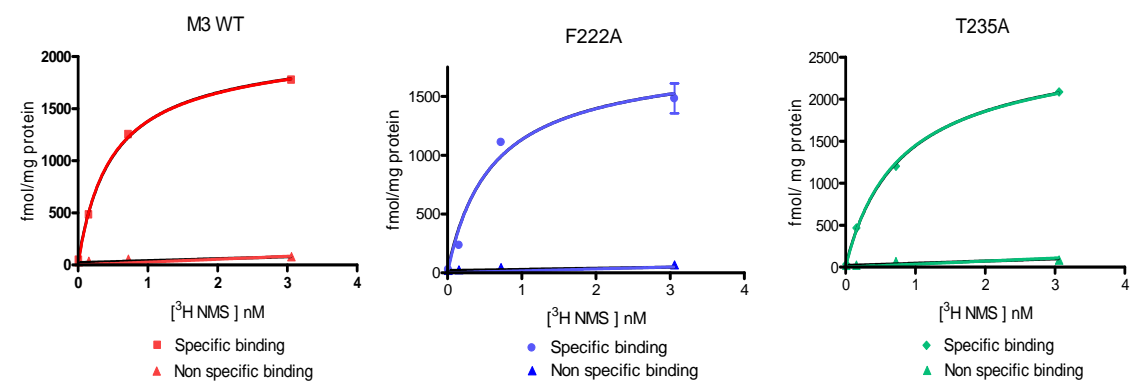

Supplement: f1 [file 789741.f1.pdf]
